# Supplementary material
Source: publisher site journal article supplement (https://www.dovepress.com/article/549357)
Supplement: Supplementary file 1 [file 549357%252509Supplementary%20materials.docx]

Supplementary Table S1. Baseline characteristics of the discovery and external validation cohorts

| Variable | Discovery gout cohort (n=65) | External gout cohort (n=24) | P value | Discovery controls (n=65) | External controls (n=24) | P value |
| --- | --- | --- | --- | --- | --- | --- |
| Age (years) | 52.94 ± 7.45 | 53.21 ± 7.11 | 0.812 | 52.77 ± 6.48 | 52.96 ± 6.55 | 0.874 |
| Male, n (%) | 35 (53.8) | 13 (54.2) | 0.972 | 34 (52.3) | 13 (54.2) | 0.882 |
| BMI (kg/m²) | 25.31 ± 4.24 | 25.47 ± 4.12 | 0.855 | 26.62 ± 4.36 | 26.58 ± 4.20 | 0.964 |
| Serum uric acid (µmol/L) | 332.04 ± 47.62 | 328.75 ± 45.90 | 0.674 | 254.10 ± 34.54 | 252.89 ± 35.02 | 0.911 |
| Serum creatinine (µmol/L) | 85.58 ± 14.98 | 86.12 ± 15.27 | 0.846 | 86.41 ± 14.75 | 85.95 ± 14.80 | 0.902 |
| Fasting glucose (mmol/L) | 3.49 ± 0.96 | 3.52 ± 0.94 | 0.901 | 3.41 ± 0.97 | 3.44 ± 0.95 | 0.889 |
| Triglycerides (mmol/L) | 1.35 ± 0.48 | 1.33 ± 0.50 | 0.879 | 1.28 ± 0.46 | 1.30 ± 0.47 | 0.916 |
| Total cholesterol (mmol/L) | 4.21 ± 0.78 | 4.18 ± 0.75 | 0.851 | 4.03 ± 0.68 | 4.05 ± 0.70 | 0.941 |
| HDL-C (mmol/L) | 1.68 ± 0.27 | 1.70 ± 0.25 | 0.764 | 1.69 ± 0.29 | 1.68 ± 0.28 | 0.927 |
| LDL-C (mmol/L) | 2.15 ± 0.78 | 2.11 ± 0.80 | 0.821 | 2.11 ± 0.74 | 2.10 ± 0.72 | 0.955 |
| CRP (mg/L), median (IQR) | 5.36 (4.43–6.27) | 5.28 (4.35–6.20) | 0.912 | 2.78 (1.5–3.89) | 2.81 (1.4–3.92) | 0.933 |
| hs-CRP (mg/L), median (IQR) | 5.19 (4.41–5.62) | 5.22 (4.38–5.60) | 0.937 | 1.05 (0.64–1.63) | 1.06 (0.65–1.60) | 0.958 |


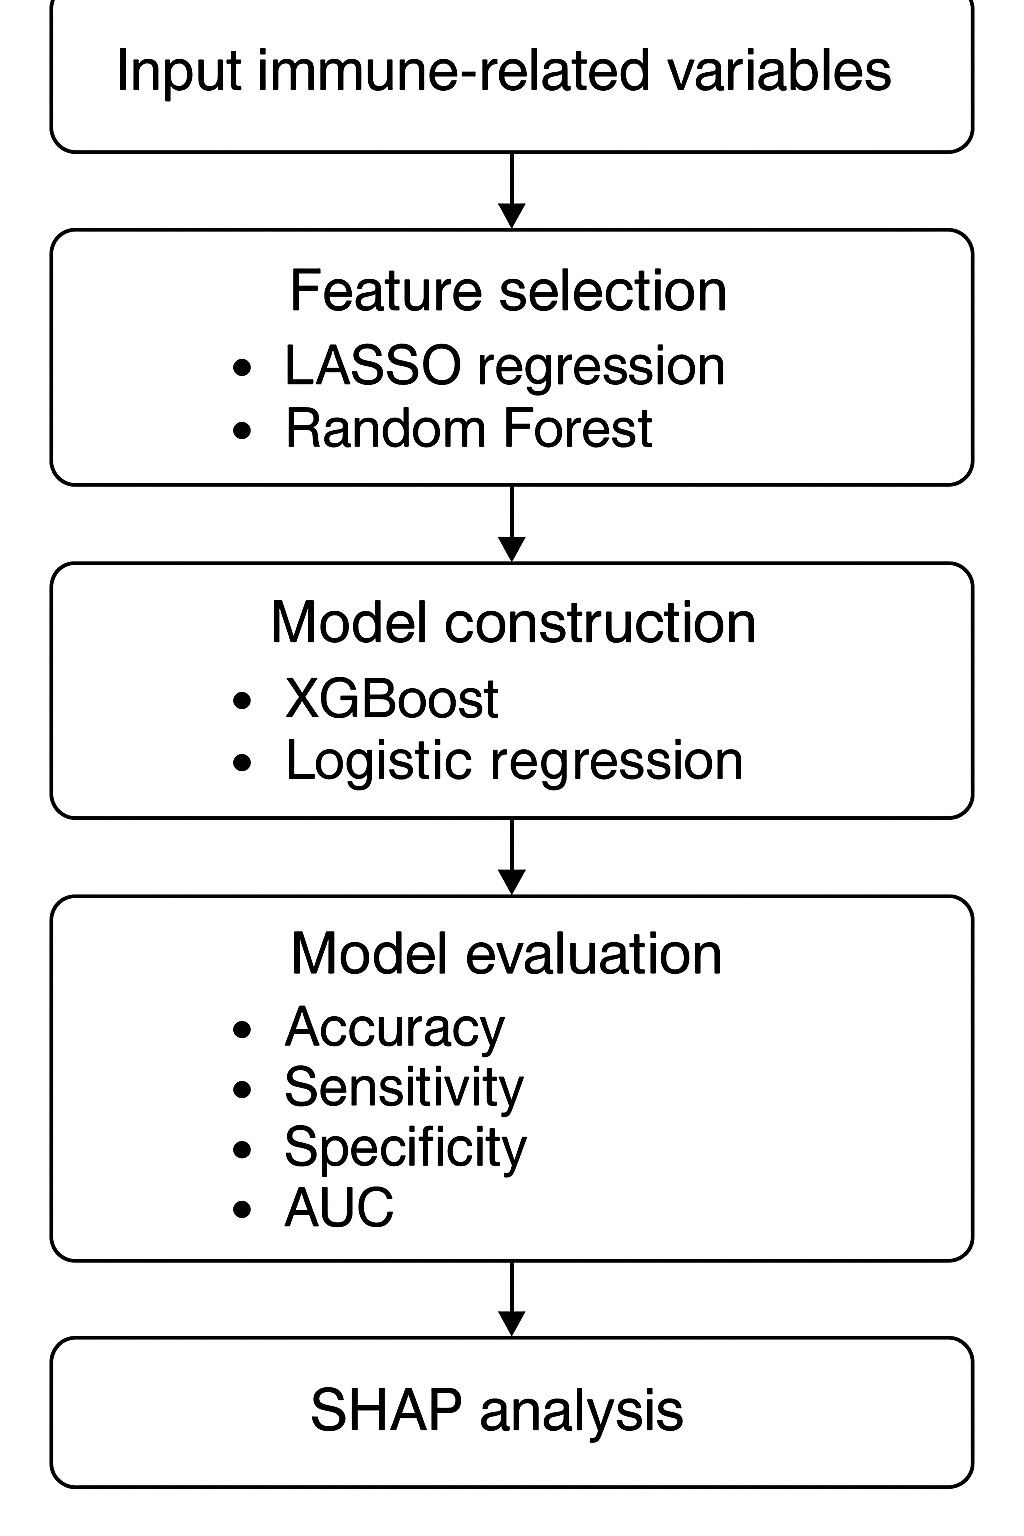


Figure S1. Machine learning workflow for identifying immune factors associated with gout.

This figure illustrates the overall modeling framework. Immune variables were standardized using Z-score normalization, followed by feature selection through LASSO regression with 5-fold cross-validation and Random Forest (RF) variable importance ranking. Candidate features identified by both methods were incorporated into predictive modeling using eXtreme Gradient Boosting (XGBoost) and multivariate logistic regression. Model optimization was performed via grid search and cross-validation, with performance evaluated by accuracy, sensitivity, specificity, and area under the ROC curve (AUC). SHapley Additive exPlanations (SHAP) analysis was applied to the XGBoost model to interpret the contributions and directional effects of key immune factors.
